# Supplementary material for: Care Partner Engagement in Secure Messaging Between Patients With Diabetes and Their Clinicians: Cohort Study
Source: PubMed Central journal article supplement (PMC10891488; doi:10.2196/49491), 2024-02-09
Supplement: diabetes_v9i1e49491_app1.pdf [file diabetes_v9i1e49491_app1.pdf]

Supplement A. Total person-time of observation among patients with type 2 diabetes who are active users over the entire cohort study period, from 2006-2015 (N=7,659 patients). Active users were defined by starting observation from patient/proxy initiation of first secure message to the end of the study period or to patient leaving the health system if the patient left before the end of the study period.

| Year                | Total person-months of observation among “active users” | Total person-years of observation among “active users” |
|---------------------|---------------------------------------------------------|--------------------------------------------------------|
| 2006                | 11,477                                                  | 956.4                                                  |
| 2007                | 29,013                                                  | 2,417.8                                                |
| 2008                | 42,372                                                  | 3,531.0                                                |
| 2009                | 53,097                                                  | 4,424.7                                                |
| 2010                | 61,118                                                  | 5,093.2                                                |
| 2011                | 67,384                                                  | 5,615.3                                                |
| 2012                | 70,024                                                  | 5,835.3                                                |
| 2013                | 71,554                                                  | 5,962.8                                                |
| 2014                | 71,694                                                  | 5,974.5                                                |
| 2015                | 70,812                                                  | 5,901.0                                                |
| Entire study period | 548,545 person-months                                   | 45,712 person-years                                    |
