# Supplementary material for: Care Partner Engagement in Secure Messaging Between Patients With Diabetes and Their Clinicians: Cohort Study
Source: PubMed Central journal article supplement (PMC10891488; doi:10.2196/49491), 2024-02-09
Supplement: diabetes_v9i1e49491_app2.pdf [file diabetes_v9i1e49491_app2.pdf]

**Multimedia Appendix 2.** Type of portal access and proxy authorship for any proxy users on behalf of patients with type 2 diabetes over the entire cohort study period, from 2006-2015 (N=3,782)

|                                                                            | No (%)                     |
|----------------------------------------------------------------------------|----------------------------|
| <b>Type of proxy use</b>                                                   |                            |
| Registered proxy use                                                       | 197 (5.2)                  |
| Informal or “hidden” proxy use                                             | 3,585 (94.8)               |
| <b>Percent of all patient messages (2006 – 2015) authored by any proxy</b> |                            |
| (continuous %) of secure messages by any proxy                             | 27% ± 30% (range 0.4-100%) |
| <50% of secure messages by any proxy                                       | 3,007 (79.5)               |
| ≥50% of secure messages by any proxy                                       | 775 (20.5)                 |
